# Supplementary material
Source: MDPI journal article supplement (https://www.mdpi.com/2227-9040/11/1/63)
Supplement: s1 [file s1]

Supplementary material

# Bulk Modification of Sonogel-Carbon with Polyaniline: A Suitable Redox Mediator for Chlorophenols Detection

Paloma Calatayud-Macías, David López-Iglesias, Alfonso Sierra-Padilla, Laura Cubillana-Aguilera \*, José María Palacios-Santander \*, Juan José García-Guzmán

Department of Analytical Chemistry, Institute of Research on Electron Microscopy and Materials (IMEYMAT), Faculty of Sciences, Campus de Excelencia Internacional del Mar (CEIMAR), University of Cadiz, Campus Universitario de Puerto Real, Polígono del Río San Pedro S/N, 11510, Puerto Real, Cadiz, Spain

\* Correspondence: laura.cubillana@uca.es (L.C.-A.); josem.palacios@uca.es (J.M.P.-S.)

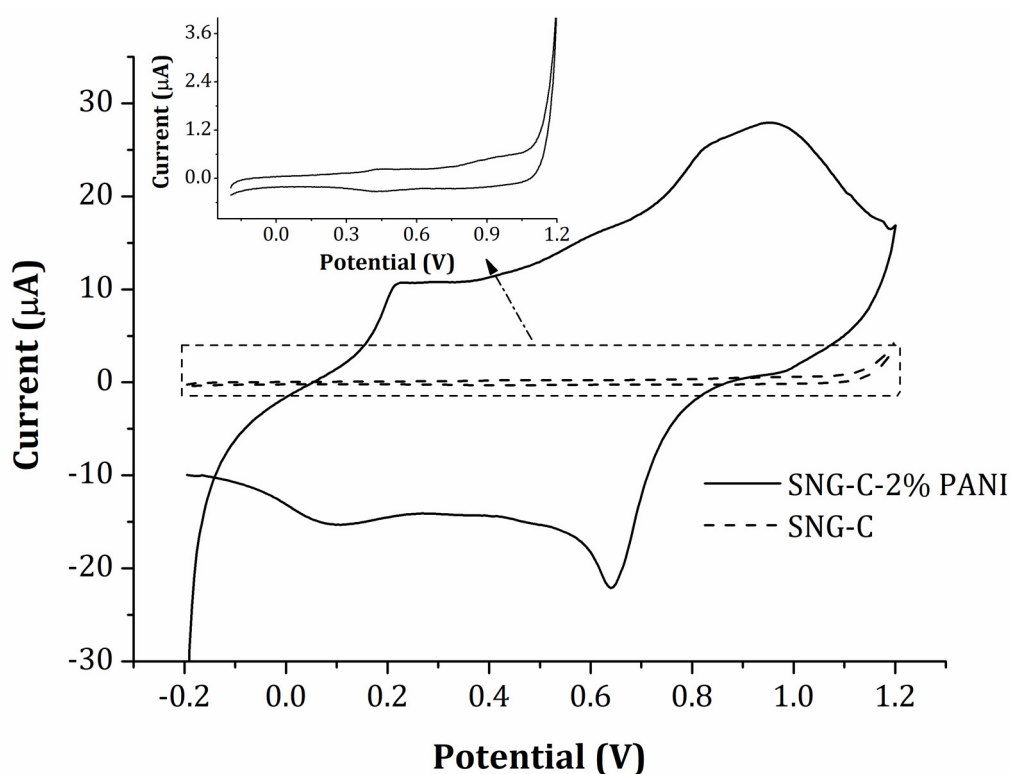

**Figure S1.** Cyclic voltammograms recorded with SNG-C and SNG-2% PANI in free-analyte 1 M HCl solution. The inset reports the cyclic voltammogram recorded with Sonogel-Carbon

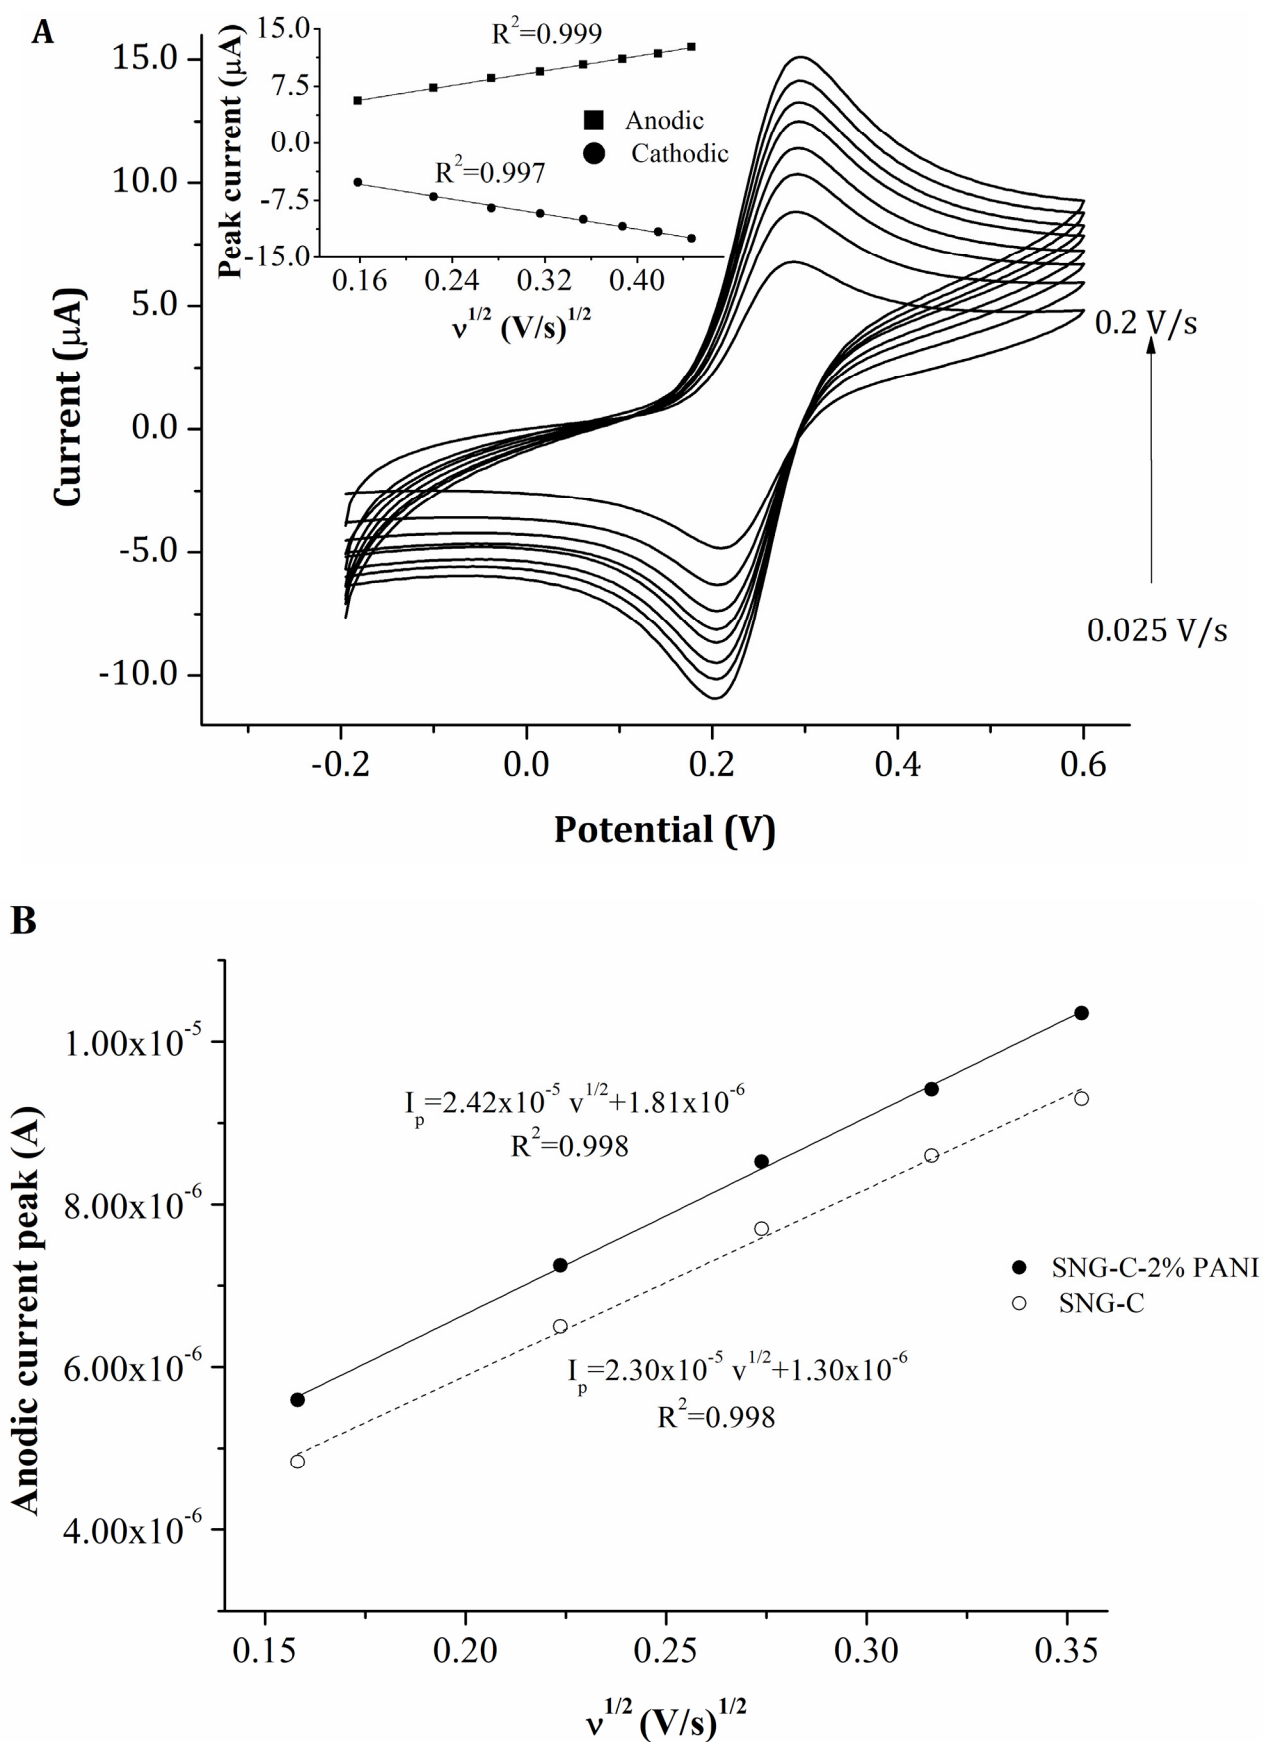

**Figure S2.** (A) Cyclic voltammograms recorded with SNG-C-2% PANI in presence of 5 mM of potassium hexacyanoferrate (II) in 0.5 M KCl at different scan rates. The inset reports the relationship between the peak intensity and the square root of the scan rate (B) relationship between the anodic peak intensity and the square root of the scan rate in presence of ferrocyanide recorded from 25 mV/s to 125 mV/s with SNG-C and SNG-C-2% PANI composites.
