# Supplementary material
Source: MDPI journal article supplement (https://www.mdpi.com/2227-9040/11/1/63)
Supplement: s1 [file s1]

Archive with 1 entries (1 files):
- chemosensors-2115247-supplementary.pdf
